# Supplementary material for: Imagination Beyond National Jurisdiction - Computing and Envisioning Possible Sustainable Futures for the High Seas
Source: Research Square preprint supplement (doi:10.21203/rs.3.rs-2318082/v1), 2022-12-05
Supplement: Supplementary file 1 [file 53907b5b1ed6046a0381cd17.docx]

**Supplementary Information 1**

*Story 1 “The Ocean Uprising”*


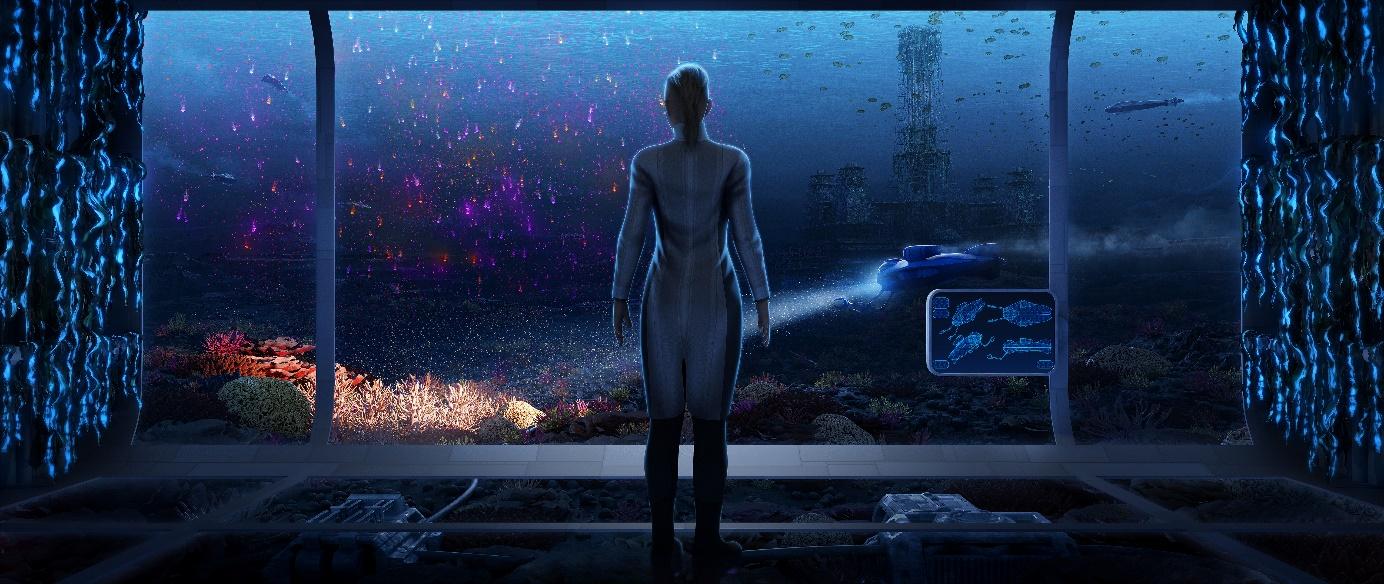


She did like talking to an audience, it gave her a confidence she did not usually possess. The soft light radiating from the bioluminescent algae coating the walls bathed the room in blue and green colors. It was an interior design trick that simultaneously increased oxygen in the submersible, served as a light source and substituted for flowers and plants, which would not survive life in the twilight zone. Unlike the geo-engineers and scientists on the other platforms, who came for a few weeks to work and then raced back to their dryland homes, she and her companions had embraced the High Seas permanently and therefore had spent some time making their submersible feel cozy. After all, the MS Cindy was their ‘flagship’, a reminder of their rebellious days, before they’d lost their edge and assimilated into the new regime. She had told this story a hundred times before, but had yet to grow tired of it, she loved the thought of educating people and keeping their legacy alive. “If you look out of the window to your left, you can still see some ruins of sunken oil rigs. On the right, you see some monitoring equipment from the geo-engineering platform from which we started.” She had to squint to even make out the aforementioned structures under the thick algae cover and the multitudes of swarming fish and crustaceans. She noticed some cables sloppily wrapped around an artificial Lophelia reef. “Amateurs…” she sighed, but knew better than to openly discredit her employers, who were nothing but good to her. “As you probably know, the High Seas as we know them today originated from a coup carried out by a disruptive activism group, the ‘ocean uprising’, some members of which are giving you this tour today.” She could not help but make the story about herself and take credit for the events that unfolded twenty years ago. Of course, she and her crew got lucky, when a near perfect window of opportunity arose, influencing the public opinion in their favor. They had been active for years prior, blocking roads to oil refineries, hanging banners with environmentalist slogans from bridges in ports, even dismembering equipment to slow down those whose work was destroying the oceans.

Their activism was generally not received well and though the general public shared their concerns about resource extraction industries on the High Seas, they didn’t agree with their more aggressive tactics. Amidst increasing shipping trade, oil exploitation and it’s resulting accidents, as well as border conflicts occupying the minds of politicians tasked with governing the High Seas, an autonomous, remotely controlled underwater vehicle hit the global markets. Unlike any of its kind before, this AUV was mass produced and semi affordable and therefore allowed industry, science and interested laypeople an intimate look into the ocean’s fourth dimension. “As you can see on the main screen, one of the AUVs belonging to this submersible has reached the seafloor and will now check if we could keep up our sedimentation rate of 1cm per week.” She glanced over to a member of her crew checking the sediment stats, who gave her an affirming nod. “When these things were first introduced, we knew that this was our chance to win over the hearts and minds of the people. We wanted to create a piece of art so realistic yet so personal that everyone who saw it felt an immediate emotional connection to the sea. We issued a call for collaborators, who would be given access to AUVs and thus could capture any audio or visual they found appealing, which would all be combined into one multimedia artistic experience. It was our chance to literally immerse people in the ocean, engrain the High Seas into the consciousness of people, who had never traveled this far out. Of course, in order to do so, we had to capture a few of the AUVs from big corporations, which lead the media to label us as ‘eco pirates’. Instead of being offended, we were inspired. Diving deep into the history of marine radicalism, the ocean as a space which incubates revolutionary movements and seafarers as anti-authoritarian, egalitarian and collectivist people, finally gave us the encouragement to start our big coup. In concert with the release of our art project, we would blow up a pipeline in an already degraded ecosystem, to show those industry actors that we did not come to play.”

While this was her favorite part of the story, she would have to cut it short if she wanted to finish the tour on time. The underwater traffic around Tristan da Cunha Island was insane, especially on a public holiday like today. “Now it’s almost time for the moment you have been waiting for the entire tour” she could barely hide the amused yet judgmental undertone in her voice, why were people such suckers for displays of wealth and power, poorly disguised as extravagant festivities? She tilted the submersible upwards, so that passengers could look to the epipelagic zone, where billions of jellyfish, sparkling in the brightest possible colors, were gathering. All at once, as if struck by lightning, the jellyfish stopped moving and started sinking to the ocean floor, slowly descending down the water column, like snowflakes. This jelly-fall did not just look spectacular, it also served as a pathway to carbon sequestration, as part of the ‘enhanced’ biological pump. “Today we are celebrating the slowing of climate change, brought about by our innovative, efficient, sustainable and universally beneficial geo-engineering programs. This year’s festivities are sponsored by Saudi Aramcare, one of our most profitable geo-engineering businesses.” It took some mental energy not to roll her eyes. While the ocean was admittedly in much better shape since every inch of the seabed was bought by geo-engineering companies, she still felt like their revolution was stolen by sneaky, yet genius, capitalists. But what can you do when the enemy integrates your critique into their rebranding?

She continued her story “our artwork went viral only a few hours after posting it, dominating the evening news on every channel, together with the pipeline explosion. To our surprise, public opinion shifted, we were suddenly painted as the underdogs, fighting for what is right. People took to the streets, demonstrating for change, our goals seemed in close reach at last. Of course, governments were completely overwhelmed, so industry actors stepped up. It was argued that the complexity of the world just could not be planned for by a political elite, only a free market could adapt to the new discoveries and innovations springing up faster and faster. Shortly after, the largest geo-engineering experiment to date was conducted, using the High Seas as a testing ground.” She remembers the crippling anxiety she felt when tons of iron, lab-grown diatoms and grinded up silicate rocks were released into the oceans. But what should have been a recipe for disaster turned out to be a groundbreaking success. The seabed - now immensely valuable since it was mandatory for companies to compensate for all their emissions by financing carbon sequestration – would be protected from mining, oil exploitation, trawling. This wasn’t due to ethical reasons, but because the geo-engineering corporations would simply outcompete other industries. While the ‘ocean uprising’ was still grappling with questions about ocean grabbing, the intrinsic value of nature and the concentration of power, industry actors were creating facts. And while this crushed her dreams of an anarchist society living in harmony with nature, she had to admit that many things had changed for the better. “If you were wondering why we are driving so slowly, it is because the seamount we are currently passing is a marine protected area and we are not allowed to disturb the wildlife with our acoustic and radar signals. The company owning this area is very serious about conservation, it’s important for their image and it brings in extra revenue from tourist tours, such as ours.”

She looked down through the glass floor of the MS Cindy, the beauty of the cold-water coral reefs growing on the seamount still took her breath away. At first artificial structures had to serve as a reef, with conservation workers using AUVs struggling to mimic natural processes. Now that the ocean got cooler and more alkaline again, real corals were growing back, and the reef would be mostly natural again soon. Whenever she felt especially frustrated with the fate of the High Seas or the ‘ocean uprising’, which had been inactive in recent years, she looked at nature healing and reminded herself, that she chose what was good for the majority over her personal ambitions. “And now, for our final and most important stop of our tour...” she turns to her audience, which consists – to no surprise – of posh couples from wealthy industrial nations; “we will circle a ship that has been declared marine cultural heritage quite recently. It was used to bring enslaved people from their homelands to the newly established colonies in Latin America. If you look closely, you can still spot the balls and chains, they take hundreds of years to corrode. See, for our next mission, we aim to decolonize the High Seas imaginary, counter the dominant narrative of a historical freedom of the High Seas. Some nostalgic dryland dwellers complain that too much has changed out here, that we lost the mysterious last frontier, but to be frank, the only people who historically felt free in these waters, were white men.” She looks at the faces of today’s group of tourists to see if her words have had any impact. Most of them look uncomfortable, so she has done her job. “You might think that we have become irrelevant, that we only do simple monitoring and conservation jobs, but that’s not the case. We are not done here, there is always another fight to be fought.”

*Story 2 “Deep Connections”*


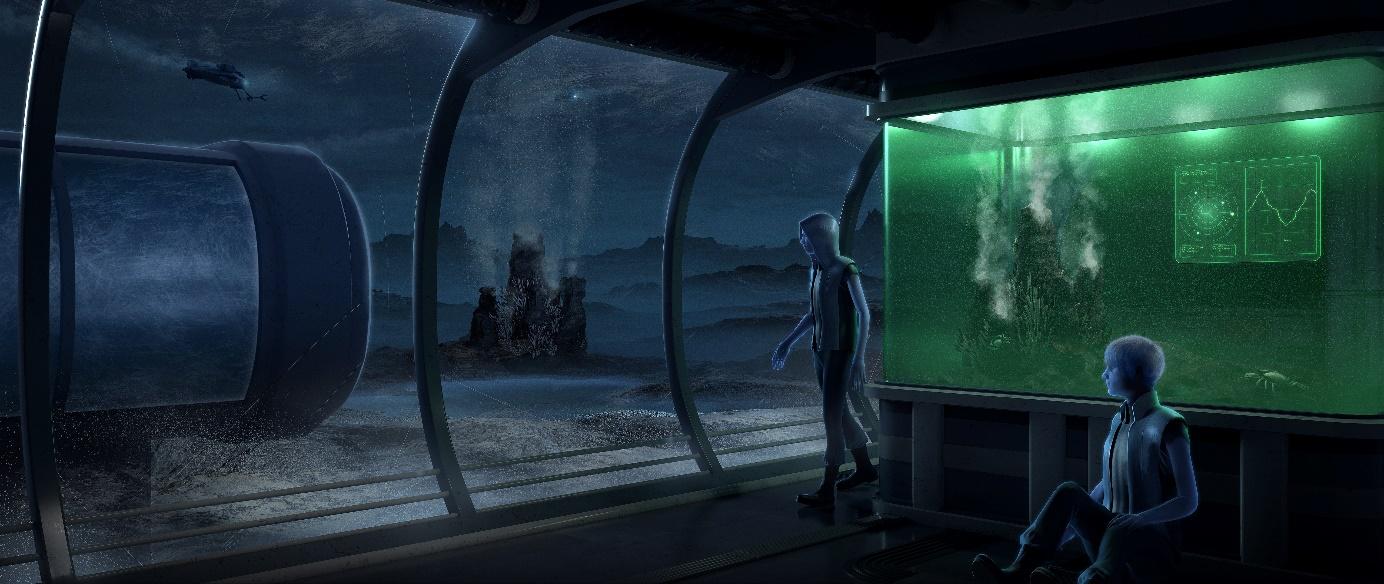


“Today is the day, I can feel it in my bones.” We are sitting on the floor of a dimly lit laboratory, our backs resting against a huge tank filled with microbes swarming around a recreation of a hydrothermal vent. Researchers have been working to convert energy derived from chemosynthesis to electricity for years, but haven’t quite mastered it, yet. The lake outside of the window seems especially vast and mysterious this evening, with its mussel beds stretching along the shores and the bodies of small fish, who dared to come too close to the brine, floating on top of it. Nervously, I am fidgeting with my partners nearly translucent hands “my god, you are in desperate need of a tan”, I try to cheer them up with a joke from another time, before we adapted our bodies to life in the deep sea, but Lux can’t even crack a smile. I can hear the sound of music and laughter from a feast our community is having; it echoes through the interconnected rooms and halls, from the heart of the city all the way to the lower edge, to us. “I just can’t understand why you volunteered to do the most dangerous job I can think of. No one has been to our offshore processing plant in decades, who knows what happens to you if you decompress to go to the surface?” Although I feel guilty about leaving Lux and our tightly knit community for a while and certainly regret missing out on a dinner of giant isopods and frilled shark on sea lettuce, I am set on my departure. The offshore plant I am supposed to visit has reported unspecified errors. Like all manual labor, the work at this plant is done by drones, which have produced parts for our technological equipment from ferromanganese nodules ceaselessly for decades, until now. Even though these drones are the backbone of our economy, I find them incredibly dull. Of course, I have to admit that I’d rather have them pick up the nodules on the endless abyssal hills or search for places where oil and gas naturally seep out of the rock, than doing it myself, but still. The great benefit of using this technology is that we no longer depend on violent extraction methods, we can roam the deep virtually to find the resources we depend upon. Apparently, the downside is that there can be complex errors which have to be inspected in person. So this is what I will do, for the good of this community … and maybe because I have lacked a sense of purpose lately.

Lux interrupts the rambling of my mind “Also, I am reading some poetry about the interdependence of humans and ‘other than humans’ on-stage tonight, I call it the duet against dualist conceptualizations’, you can’t miss it! It reminds me of us as children, how we would practice holding our breath for many minutes to swim with the grenadiers in our aquaculture enclosure, feel the currents and try to taste all the components that make up the water. Or the time we found the octopus and tried to learn from her how to think with our arms and legs, a conversation between our bodies and the world, replacing analysis with intuition. I think you would feel better if we would go out there right now!” They are visibly excited, it’s hard to tell if the sudden glow is radiating from the photophores covering their body or their large eyes, flawlessly adapted to the dark, glistening with anticipation. I am not ready to walk down memory lane right now, so I am thankful to hear the faint voice of one of our elders from the main hall, telling the famous story of the first humans to venture into the deep. I let my head rest on Lux’s shoulder and we listen quietly. “When resources on land could no longer satisfy the demand for fossil fuels, rare earths and metals, people looked to the sea floor. Oil and gas were found close to tectonic plates in motion, just like our beloved hydrothermal vents, the basis of all life in the deep. But the humans of the old days were disconnected from nature and had no remorse destroying something before they even knew what it was, before they knew its immense value. An especially foolish project to drill into the heart of an underwater volcano seemed guaranteed to fail, and so it did, causing the most destructive eruption the world has ever seen, filling the air with toxic smoke, clouding the sun, making the upper layers of this world uninhabitable. With no other place to go, the first of our kind descended into the abyss…” With some surprise I notice that even this old re-telling is tugging on my heartstrings. I do feel a sense of pride when I think about our people, arriving in a world so different from their own, cold, dark, under so much pressure and seemingly empty. But instead of trying to conquer it, they decided to learn from it, adapt to its circumstances, appreciate its beauty and be a part of it.

I should attempt to make Lux see the situation from my point of view. “Listen, I want to contribute to this community more, I want to be useful, someone great. Think of the people we remember. The ecologists who studied deep sea organisms to understand which genes allowed them to survive here. The anthropologists who fought to prove that genome editing was ethical and allowed us to not only survive but thrive in these waters. The oceanographers who realized that the natural resources we need were not only buried in the earth’s crust, but could be found without a drill, albeit in small quantities.” I glance over to Lux, who seems to be startled by my slightly too passionate monologue. I am in too deep, so I continue. “Your job is valuable! When you travel to the nodule fields after our drones have collected all there is to collect and you replace the nodules with stone structures and redistribute larvae of sponges and other species that should live there, you are giving back to nature, and I need to give back too.” Lux lets out a deep sigh which seems to contain all their frustration and slowly rises to their feet. “Well then, let’s get moving. What exactly is your plan?” …

I feel all my nervousness melting away as I listen to Lux humming a song next to me, steering the transport drone away from our city. From a distance the metropolis reminds me of a lit-up starfish, clawing into the hills it was built upon. When we slowly ascend the slopes of the hydrothermal vent, I have to remind myself to treasure this moment, to take it all in. The vents are sacred in our culture and people are only allowed to be near them under special circumstances. It is almost unfathomable to me, how such little organisms, feeding off nothing but sulfur or methane spewing out of the vents, are then food for the tube worms, shrimps and mussels around them, which in turn will be fed to the fish in our aquaculture farms, which then … Just before I can get stuck in my head again, I turn to Lux to ask if they are thinking the same. “I guess its human nature to be fascinated by our surroundings and seek answers… To the pursuit of knowledge, humanities highest calling” Lux exclaims, raising an imaginary glass, their voice dripping with irony. Our laughter echoes through the darkness. Finally.

*Story 3 “Kairei City”*


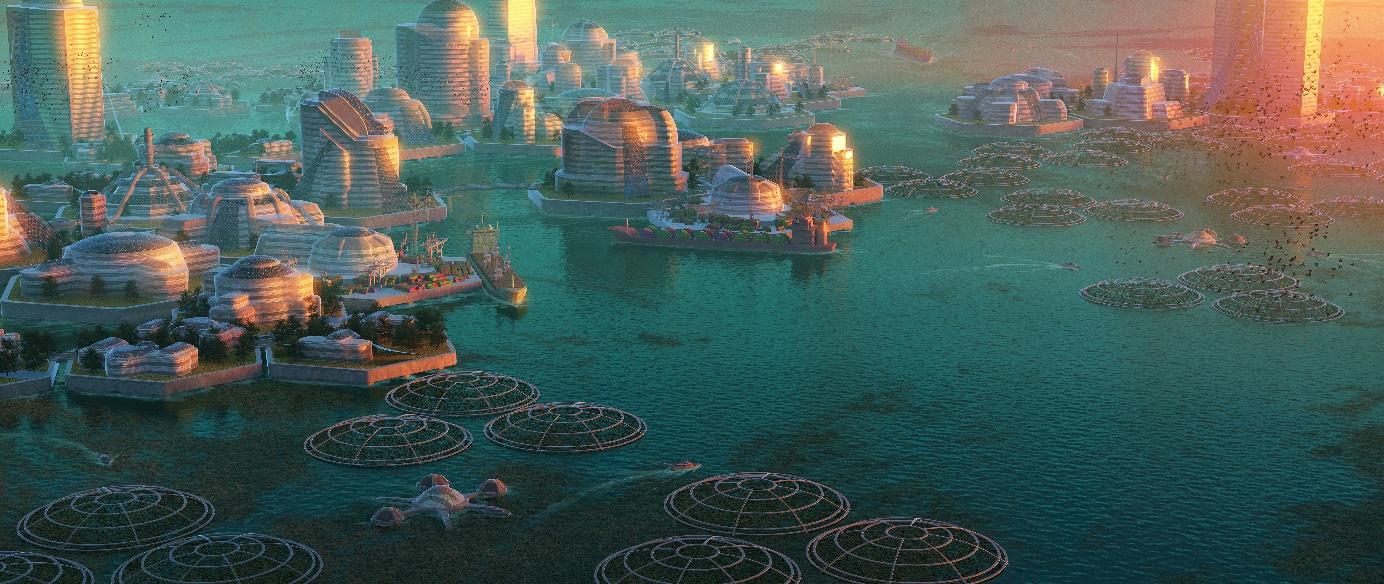


The boat is gliding over the water with an incredible speed, it feels like we’re flying past the vast floating structures in which seaweed is cultivated, creating waves in the deep green kelp jungle we are passing through. I take a last look back at the shores of the exclusive economic zone of Lesotho, mourning the loss of my seaweed farm, which was buried under a sudden influx of sediments, a common problem here. I can’t afford to rebuild what I have lost, which I decided to view as a nudge to finally come live with my cousin Katara in the infamous High Seas state, something she has been suggesting for years. I turn around to ask the captain about our incredible speed, a question which he already anticipated: “We are using state of the art solar power motors in combination with indigenous knowledge about ocean currents and wind patterns, using natures forces to our advantage. We’re really going ‘back to the future’ with this technology.” I laugh out of politeness, but my eyes wander to an assortment of old newspapers, laid out to entertain travelers many years ago.

*THE UNITED STATES OF AMERICA INVADE THE HIGH SEAS; Conflict over access to ocean space escalates, Supreme Court leader rests case on the ‘fact’ that US never officially ratified the law of the sea; Is it technically legal to annex an area of the High Seas under US legislation? Incident sends waves of outrage through international policy community - ten out of twenty-one judges on the International Tribunal for the Law of the Sea resign due to burnout!*

“How was this possible?” I ask my new acquaintance. “Well… people feared an ecological catastrophe and got more confrontational under pressure. At that point, international negotiations such as the conference of the parties were a performance rather than an actual political event. Instead of limiting emissions to halt climate change, politicians agreed to designate the High Seas as a sink for more emissions, by planting endless seaweed monocultures and kelp forests. And thus, the race to the High Seas began, every country wanted a piece of it for their ‘mitigation measures’” he says sarcastically, adding air quotes for emphasis. “Of course, this added fuel to the existing conflicts as it was impossible to divide the ocean space in an equitable way. The crumbling institutions tried to make static plans for a place as inherently dynamic as the ocean.” While I am fascinated by this story, something else grabs my attention – I can spot Kairei City, the floating capital of the High Seas state on the horizon! It is mesmerizing, built entirely out of glass, which is breaking the sunlight, yet letting some rays shine all the way through to the water and the creatures in it.

After a tour of her place and lots of unpacking, Katara and I are lying on the crunchy meadow outside of the city. The nutrient dense shallow waters above submarine ridges are often coated with large seagrass patches, which can be used as outdoor spaces by the inhabitants. In the distance, I see some people seemingly chasing each other, gliding on boards while holding on to kites, with a ball being passed around. “They’re playing kitesurf lacrosse” Katara explains, “it is fantastically chaotic, we should play tomorrow.” As much as I would like that, I decline, since tomorrow I’ll have a job interview at the RFMO - the reformed fisheries management organization – to become a marine spatial planner. In the short time I have spent here, I already learned that nothing out here has fixed boundaries, as that is just not common in nature. Instead, all of our structures are moved around dynamically, to adapt to the oceans’ conditions. Protected areas follow fish migrations and are attuned to their lifecycles and behaviors. Similarly, seaweed plantations and kelp forests are moved to places with high nutrients and low oxygen, so they can balance out these areas and still have optimal growth. The floating structures in which the plants are cultivated are then used by fish as shelter and feed, which forms the basis of our multitrophic, cageless aquaculture. The city itself is moved whenever the solar sails can’t collect enough sunlight, or we feel like we are disturbing the wildlife with our continued presence.

Interrupting my thoughts, Katara jumps to her feat, suddenly stressed “Oh crab, I forgot about the assembly! Come with me, we’re already late.” Hand in hand we run through the city, which is crisscrossed by canals and bridges, ensuring that the ocean is near every home. “What kind of assembly are we late to?” I ask, already out of breath. “The whole city will meet to discuss a new experimental governance approach. The High Seas state was only a first step in truly honoring nature as a partner, not as a commodity. Recently, we declared the ocean as its own legal entity, with inherent rights that we are here to protect. We are still learning how to implement this and since governance should be based on our shared experiences, everyone is asked to participate in the discussions. This might be a little foreign to you, but you’ll fit in alright. The main thing you need to understand is that this place is part of us now, it’s our home.” Just in time, we reach an open space in which people have gathered in a circle, with the speakers of this assembly placed in the middle. A young woman takes center stage and begins the gathering with a speech “Welcome to the 45th biannual assembly of the Fluid Pluriversity, I am so glad you are here”. “I have never heard this name before” I whisper to Katara. “I know” she nods “this is what we call ourselves, but it is a bit esoteric for the international policy arena, so they just call us the High Seas state”. She gestures that I should focus on the speech. “As you all know, our beautiful, life-giving ocean needs to be cared for in a holistic manner, by a united, responsible entity. We are all devoted to the same goal, but we must not forget our roots and continue to celebrate the plurality of ways we value and relate to the ocean. I believe that the deeper you move into participating in the transcendent, the more you find that there is great individuality within it. We’re all one, but we are all unique representations of it. I look forward to hearing your thoughts and learning together today.” I glance over at Katara again, this time visibly confused. “You’ll understand once you’ve spent some time here,” she says softly. This is great news since I certainly don’t understand it now, but I get where the ‘esoteric’ comes from. I let my gaze wander along the faces in the crowd to the transparent roofs of Kairei City, breaking the light of the setting sun like a kaleidoscope. I can feel myself dozing off, while trying to listen to the speech and the following discussion. It’s been a long day and I am exhausted, but also excited to see what tomorrow will bring; there is so much to learn here.

*Story 4 “Myopia”*


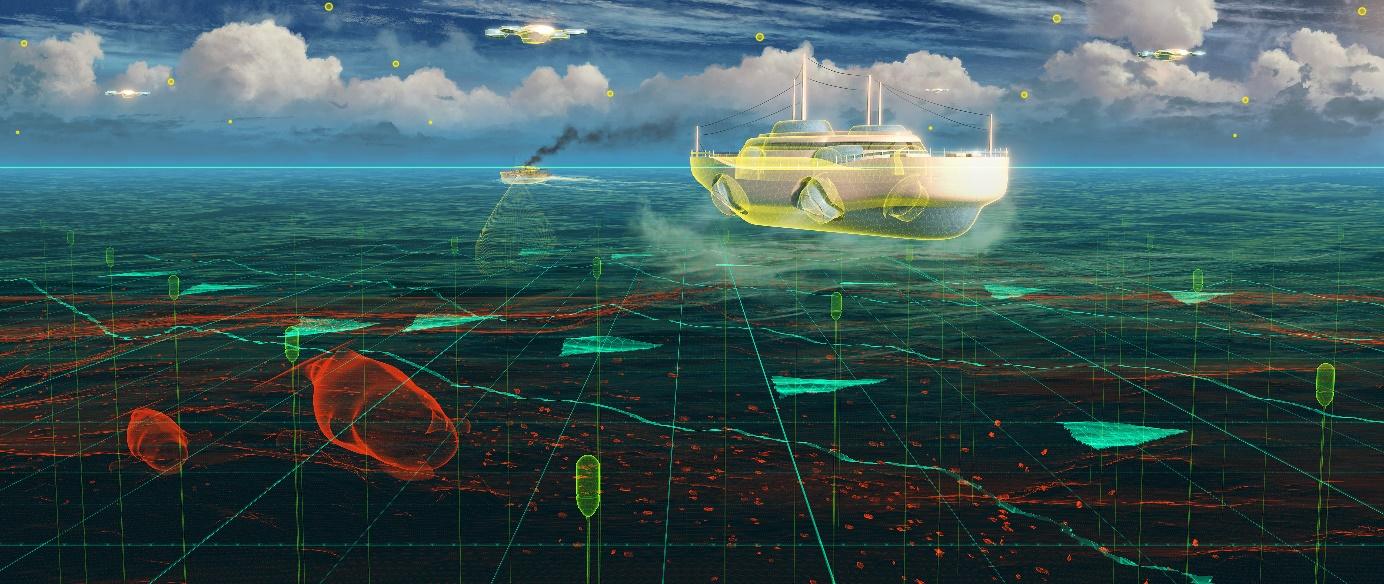


He ends this day as he ended the last day and the day before that, sitting on his couch watching a family friendly and lighthearted TV show, something to calm his busy mind. Tonight, a re-run of a science-cooking show is on, the contestants are tasked with cooking a surprising meal out of non-red listed, noninvasive, fast reproducing and thus fast recovering fish, while explaining their function in the ecosystem. He imagines himself trying to cook one of the meals from the episode, but realistically, he will order takeout. “How did I get here?” he sighs. His eyes fixate on the banner of the century of ocean science, a multitude of satellites orbiting a stylized tuna, which is still placed over his TV. The stupid fish seems to be mocking the loss of his lifelong contract with the university, due to a tiny mistake that wasn’t even really his fault. Like every other scientist, he was supposed to spend his entire career on one project, to align his work with the timescales of ecological processes. A faint melodic sound interrupts his thoughts, he tends to forget to turn off his Aletheia – a device to receive, process and visualize big data, which he recently got implanted for maximum efficiency and comfort. The fading scar on his left-hand tingles, as exabytes of satellite images and their accompanying metadata run through his nervous system to reach his brain. He has always been closely connected to his tech equipment, taking it everywhere he could. Almost every waking hour was spent following the movement of the ocean current models or the ships and schools of fish represented by tiny moving dots on a map. The only thing slowing down his work was the time he needed to type stuff with his clumsy fingers or switch between open tabs, so it was the next logical step to cut out the middleman and just implant the device. And it was marvelous, it felt like he was seeing the whole ocean in all its depth and complexity through data streams and models. He is startled by another ringtone; it takes him a second to realize it is his phone this time. He answers the call and is overjoyed to hear the voice of his colleague and mentor. “Muizenberg, we need your help.” The words are like music to his ears. He is so excited; he barely listens to the rest of the call. “Someone is using opaque data to evade our monitoring systems; we need to find out where this is coming from, before any damage can be done. This might be your chance to fix your reputation, come into the office as fast as you can.” He is on the road in no time, dreaming to resume his place in the community. He might even have a chance to and pitch his newest idea to his colleagues: a hydropower station that predicts where eddies form to follow them, using the power of calculations to harness clean energy. He flies up the stairs to his colleague’s office and enters to a familiar sight: the whole room is filled with a hologram of a particular point of the High Seas, swarms of fish, plants and even the currents are visualized by dancing rays of blue electricity, bringing the ocean directly into the office.

Dr. Mbatha looks up from the screen she is studying. She doesn’t waste time exchanging pleasantries, but a warm smile indicates that she is happy to see him, which she would never admit, of course. “There you are, finally. You understand why this is of highest importance, right? These criminals had the audacity to hack into some of our satellites, effectively creating a blind spot in our transparent ocean. This is incredibly embarrassing for our institution; the government and the public are expecting us to keep track of all activities in the Southern Ocean and these people somehow manage to literally fly under our radar. Not to forget the environmental consequences, I’m sure whoever is behind this wants to make a profit from illegal fishing, either by scoping out changed migration routes or changes in fish morphology. Species are adapting and evolving so fast these days, if a subspecies differentiates enough from the original, our cameras won’t recognize it anymore and we lose track of them. The species will be fished to extinction before we know it existed. It is our duty to ensure that all ocean data is collected, analyzed and shared in a transparent manner. You of all people know what happens if data is placed in the wrong hands.” He stares at the ground, embarrassed that she is bringing up his past again. It never occurred to him to ask why they needed him, the employee best known for being chaotic and unreliable, for this mission. Dr. Mbatha continues “to be honest, I am out of my depths here. I thought we had finally won this fight; how can illegal fishers possibly compete with almost complete remote sensing coverage and skyrocketing citizen science? Millions of updates are shared online every day, laypeople are publishing geo-tagged pictures, analyzed plant and water samples, animal sightings. It just seems impossible to me that no one has any knowledge on these last remaining illegal activities.”

She looks incredibly frustrated, but not yet defeated, as she lets him in on the plan. “We want you to pose as a high ranking “client” for opaque data, so that we can bait the criminals into meeting us. I know it sounds ridiculously outdated to meet them in person, but they might trust you, since you’re not affiliated with an institution anymore. And we might be able to trust you again, if this goes as planned.” The thought of a second chance is so tempting, he would do anything to be part of the team again. Also, he dislikes opaque data as much as the next scientist, so being able to put an end to these murky businesses would give him considerable personal satisfaction too. Therefore, he agrees to meet Dr. Mbatha and her team in the harbor tomorrow and heads out into the night. To clear his head, he decides to walk home, looking at the night sky, the vast darkness disrupted by a seemingly infinite number of gleaming satellites racing through the sky like steampunk stars.

The next day, brimming with excitement, he is sitting on deck of a high-speed HoverBoat, going over the details of the plan Dr. Mbatha had explained to him earlier. He is fascinated by his surroundings; he hasn’t seen the open ocean with his own eyes in years. The smell of salt and algae, the wind on his face and the sounds of seabirds are complementing the data on sea-surface temperature, algal blooms, recent pollution events and the speed and direction of the currents that his Aletheia is showing him. Maps and models visualize behind his eyes, using these datasets to calculate the presence of fish, which genus they belong to and where they might be going. A swarm of drones, fully equipped with high resolution cameras fly over his head and as he leans a bit over the guardrail, he can see the floating buoys and underwater gliders, collecting the data he and other scientists will receive soon. As he approaches the intended meeting place, he turns off his Aletheia as well as the GPS device on his boat, to signal to the criminals that he is one of them. In doing so, he immediately feels more vulnerable, as if some essential part of his body was missing. A vessel appears on the horizon, he stiffens and mentally prepares for the meeting.

His palms are sweating as he enters their vessel. It looks like it has been in use for decades, rusty and haphazardly self-repaired in many places. There is already a net dragging behind it now, leaving no doubt that they are using the blind spot to fish illegally, but the catch they could make using the satellite data they’re collecting will be worth a lot more. He walks up to the crew and can’t help but notice the tiredness on their faces, the worn-out clothes that look like they might have slept in them. For some reason, this situation makes him acutely aware of his privileged position, the enormous amounts of power and influence he wields as a scientist. He’s too nervous to stick to his script and starts to make awkward small talk instead, a grave mistake since the criminals don’t feel like a dot on the map any longer, but are slowly becoming three-dimensional beings, who might even have a reason for their illegal behavior. He was taught that remote sensing revealed the objective truth, enabling all-encompassing transparency and radical honesty but he can’t shake the feeling that his colleagues and supervisors have missed something crucial by converting a place as mystical and lively as the ocean into strings of data.

He knows that right now, Dr. Mbatha is pacing around her office, her eyes glued to the hologram, waiting for him to fulfill his part of the mission. He remembers laughing at her plan earlier, he still can’t believe this is all they could come up with. Using a hidden microphone or a drone would be too obvious, and the criminals would notice satellite or GPS signals as well. Yet hopefully, they are not aware of the recent advances in monitoring of the water column. To let his colleagues know where their vessel was headed, he had dropped stones over the guardrail every couple of minutes. The idea was so old school, no one would expect it. The stones would be noticed by the tagging cameras attached to underwater rock formations or floating gliders, which then sent a signal back to the office. At this point, every inch of the water column underneath the vessel was closely monitored. He was supposed to push some of the criminals overboard into the transparent ocean, thus revealing their identities. Their faces would be all over the internet by the end of the day and their confessions would hopefully uncover the last remaining secrets of the illegal fisheries and opaque data trade. But he is not going to follow the script! Instead, he makes the split decision to jump overboard himself. He can picture the scene at the office perfectly, himself appearing as part of the ocean hologram, as if he was dropped from the ceiling into the room, Dr. Mbatha’s puzzled facial expression. That should give the criminals enough time to disappear.

The water is cold and refreshing, he feels like his mind is clear and calm for the first time in months. He turns his Aletheia back on - at this point he is not going for subtlety anymore. He realizes that his seemingly flawless view of the ocean was all wrong. Institutions had become powerful due to their access to technologies, they had split the ocean into territories, measured and monitored it, but at the same time forgot about the oceans messy materiality intertwined with our messy humanity. In the last couple of years, the High Seas had felt predictable, demystified, maybe even less exciting to him, but now that he was floating amongst the waves, they are wild and wonderous again. He can’t help but think of all the tech that has gotten him into this situation in the first place; the satellites, the Aletheia, the hologram. His work, his daily life and even his emotions are inextricably linked to technology. While his view of the world was mediated by technology, it was nonetheless his subjective view. He wouldn’t want to change that; it was just time that he acknowledged it. His phone rings and he knows it's Dr. Mbatha before he picks it up. He will have to think of a damn good apology this time.

**Supplementary Information 2**

*Search string*

TITLE-ABS-KEY (({high seas} OR {international waters} OR {deep sea} OR {open ocean} OR abnj OR

bbnj OR unclos OR rfmo AND future OR adaptation OR mitigation OR transformation OR intervention OR change OR scenario OR projections))

**Supplementary Information 3**

*Interview guide*

1. How did the use of creative, imaginative methods influence how you think about the

future of the high seas? Did this process challenge any of your views and assumptions?

(*As an example, mention visual art, storytelling, visioning exercises, use of science*

*fiction elements*)

2. Do you think you will use these (or similar) methods, or insights you have gained while

engaging with these methods, in your future work? If so, how?

*In a short disclaimer, I explain that I want to connect the stories to current realities or current*

*socially shared imaginaries, which is why I am asking them these specific questions. I give an*

*example of an imaginary.*

3. Do you recognize any elements of your own work or professional knowledge about the

ocean in the stories? If so, which ones?

4. Do you recognize any elements of the present in the stories? (*As an example, mention*

*ideas in scientific discourse from other fields, niche experiments that only exist at the*

*margins, or elements in popular culture and the media (movies, novels)).* If so, which

ones?

5. Are there elements in the stories that you think are super unrealistic and won’t happen

in the future? What do you think might happen instead?

6. Do you think engaging with this type of stories can open up transformative spaces, e.g.,

spaces that are ‘safe enough’ to reflect on, experiment with, or discuss new ideas?

(*Emphasize that I mean creative, science-fiction inspired, character driven stories,*

*which my stories are just one example of*) If so, how?

7. Do you think this type of story can be an effective communication tool? Do you have

any ideas how they can be used to elicit a heightened interest in, or an (emotional)connection to, the oceans or High Seas?

**Figures**

**Tables**

**Supplementary Information 4**

*Interview excerpts*

Table 9. Excerpts from the Interviews, sorted into four categories

| Parti-cipant Number | Positive Aspects, Potential of Creative Scenario Methods and Stories | Specific Applications for Creative Scenario Methods and Stories | Story Elements Prevalent in Current Imaginaries | Limitations/ Critiques of the Method and Stories |
| --- | --- | --- | --- | --- |
| 1 |  | Yeah, definitely, if we have any kind of strategy or futures or horizon scanning type of work, it might be useful to have an introductory talk by someone who writes creative, fantastic futures (…) If you can show that the horizon can have these…insane things, not just the things you’re thinking of from a current point of view, think broader, that would make individuals more confident in their thoughts. Because otherwise people won’t say things that might sound weird. But if you start off with one of the stories, people are less concerned about looking awkward or weird.  As I said, the next time I'm planning an event, I can open it with a little story telling session. And I think that will give people the creative burst of mind (…) it brings them into the reality that we are not just thinking about the next 5 years we’re thinking about far, far longer than that. | When you described the sharing of scientific data and a fully transparent ocean, that made complete sense.  Yes, chemosynthesis is talked about quite a bit, even now. The second thing is sharing data. For Antarctica this has been the cornerstone of research, since the sixties | (Did this approach challenge your view of the future of the High Seas?) Some influence but rather on a contextual side, not a direct influence, which is also good, I guess.  (Regarding a story) I kept thinking no, you shouldn’t do that. Why would he just jump in the ocean? He could do something heroic or crazy instead of just giving up.  (Regarding the story element that some groups would try to collect secret data): If borders are kept alive, data collected by the military could be secret, but then you label it differently and don’t call it research data. |
| 2 | I am definitely going to bring into my work ways of making sure that I reach different groups of people who have different perceptions and different ways of learning (…) if we can put it (scientific knowledge) into something that’s going to get people inspired and thinking, that’s the key.  By pushing us to the extreme we can then say we actually have to protect and think of other examples (…) And we know well that’s going to be reality so we can deal with that. So I think some of the stuff is pushing our limits, pushing it to the extremes of what we can properly envision but I don’t think that’s a bad thing at all, I think the thread is still bringing you back to a believable extreme if you can put it like that (…) So these things that feel like they will never happen, you think ”but there are threads in there that are so worrying because they are reflecting exactly the way we're going now” just bringing it out more vividly.  Transformation is all about doing something completely different (…) it's getting you to a point where you can look at something in a completely different way, it’s putting creative thoughts in my head (…) And so to get to those kinds of new worlds, and to move away from our collapsing world, we need to do something completely different. A complete reset in a whole lot of things, and not just in governance or not just in the way we implement the action or just in looking at a new type of evidence but how we collect the evidence, how we do something with it, the whole structure of being really (…) and this helps triggering it.  And the whole movement I think towards education but also to solving problems is going a multimedia way so, creative arts, be it stories, be it art, be it music or theater is having a huge impact and it's just bringing home the message and getting people into action. Being empathetic instead of apathetic.  (On reconnecting to the ocean) Yes, absolutely, because it gets them to start thinking “what does this actually mean in my world” | It has opened my mind a huge amount and made me think maybe if I'm incorporating – I love drawing – so maybe if I can incorporate visual art in my presentations, that would help things.  If you think about sitting around a table with your family telling them about this, they could be like “so what?” but when they start looking at the repercussions of this, using characters and plotlines it makes it much more vivid for people.  I see a huge potential in using these kinds of stories in school, junior or high school (…) but you’re really bringing home the issues by putting them into something that they can identify with (…) This is a way of doing this and getting them engaged, you could give them all topics and do exactly what you did, give them threads and say “write a story around that” | I can specifically pick up the second one, where Muizenberg is hit by the reality that ‘scientifically we need to do this and this and this’ but he looks at the people the fishermen and they're looking tired (quote suggests empathy and emotional responses).  (I also related to) the octopus, how we view the world and gather information could be really, really different.  People taking advantage of systems where there is a gap in monitoring, and you really exemplified that by saying that they have blocked out this specific area so they can tackle this dead zone in terms of surveillance (…) A lot of that is starting to happen and by making it really extreme you brought it out but there are elements there that are already happening.  And we were talking about climate refugees and collecting data and using drones. And what I really liked was your thing about the non renewable resources seeping out rather than needing destructive methods, they were just collecting.  Then we can maybe get to the sea steading, where we have the floating cities, when the islands have been subjected to sea level rise. | Well, it's probably unlikely that we can live under the sea forever or indefinitely given our systems and stuff, but I think the importance is to show us an extreme and then bring us back to a realistic future. |
| 3 | I think it can provide a basis for opening up imagination and pathways, rather than just the classic … I think or I would like to think that it can inspire people to take other approaches. I think it’s more important that we can come up with an approach that forces you to value other things. So I would like to see it influencing some real decisions. |  | There is one where you talk about shared fish, dynamic resources, nothing is fixed and they manage things more mobile, which is close to what I do. So that was fun to see. | I mean the whole idea of people living in the sea I find that hard to believe. It's not necessarily unrealistic, I just find it hard to believe. Because of what it requires, in terms of water and the diversity of food that the human diet requires. I can rather imagine guerilla style war, some people conquering some wild land and using it. |
| 4 | Because that actually pushes me to think about many other elements I need to consider, that actually don’t fall under my daily routine, or my daily area of expertise or my comfort zone, if you will.  It’s a different way of creating consciousness in the population, different audiences and people. I do believe in the power of art to create transformations. And I think that as scientists a big barrier we have, we don’t communicate well. It's too specific, it's too detailed, we are too picky. Our response is always “well, it depends”. And I think art, maybe written art, any kind of art, has been with us forever and it's something we really value and feel connected to, so I really believe in the transformation power of art for our society.  If you create awareness, maybe they understand that maybe the dystopian future is not that far from where we are living now. | I'm thinking out loud but for example when a group has to develop a scientific plan for the next cycle or so, like who do you want to be, what's going to be your strategy? I know it's not the same process but some of the elements that we used here could be adapted. It's an interesting thing. | The first story is about the seabed being bought by companies that actually are in charge of doing the conservation and management as well and that has some parallels with the reality we are living in. There are big companies buying big pieces of land and big pieces of the ocean, having their own approach for conservation and management of these. It was a bit scary to think about the whole ocean being bought by companies, rather than having an institution that can think about the common good. But I also see more parallels like when these companies are doing conservation and management of their areas, they are actually acting, in an effective way. At least they had a plan for this particular thing. And this you can see in FIPs, fisheries improvement projects, that a lot of stakeholders and industry are engaging with. These FIPs are sometimes motivated by markets and sometimes motivated by eco certification needs, because they need to show that there is some kind of improvement. So that is also happening in fisheries somehow.  In story 3, this big institution that is taking care of international waters and there is an RFMO, which I could relate to because I work for an RFMO, right? It was interesting to see how there were some elements in that RFMO that are not actually included in today's RFMOs mandates and some of the skills, for example mine is spatial planning, that happens in a pretty different way I think. It was also pretty cool to see that there were some more futuristic things suggested by the piece that we are actually engaging with these days, dynamic ecosystem management, all these things. | Yes, so I hope that the privatization of the high seas doesn’t happen. I hope that we don’t colonize the high seas, I don’t want it to happen in a very white way which is what the piece was suggesting. Like all these rich people, doing these touristic things. But it's actually scary because it's already happening with Jeff Bezos from amazon trying to go to the moon and bringing all these rich people to the moon, same with Elon Musk. I hope it doesn’t happen, I hope we respect the ocean. |
| 5 | I feel like I'm not a super traditional academic but I'm more towards that side. If there was a scale from creative to academic, I would be closer to the academic side. So, I think I do have blocks to blue skies thinking and creativity and that’s something I could do to improve what I produce in my work. And the way I think in my work (…) it really helped to push thinking into “what are we actually trying to do in the grand scheme of things?” and really think a little bit outside of the box and outside of the framework that exist currently and just engage more with the future, I really loved that.  This has really changed the way I think, it has just really broadened horizons and has changed the way I think about my work now and in the near future and in the far future. But a year ago, before I started engaging with this, I would have been like “that sounds like crap”, but now I'm a hundred percent behind this. | We should have all the policy makers at these intergovernmental organizations and all these scientists that work in these spaces be part of this exercise, just to tweak things. I know they might not like it…but I think there will be a lot who do engage with it and it does shift perceptions and relate to transformations. | But it also links back to real life so much, talking about this woman who is leading this tour and she is nodding back to her previous life where she used to do all these things that NGOs do now, and you see the same kinds of narratives, like eco activists or eco terrorists. So I think for me it was grounded almost more in real life than anything I've potentially seen in the movies but perhaps that’s just because I don’t engage much with science fiction.  I found elements of my work in them and that’s what I loved about them. It was like nerding out in a creative way, there was this wonderful look into the future or a potential future, very close to what I'm working on.  One of the things that I didn’t like and the only reason I didn’t like it is because I am a conservationist – and I’m not saying I don’t think it's realistic – but the idea that private entities ended up grabbing all the seafloor – and I absolutely think that might happen – but the fact that it was for geo-engineering, I was like “I don’t think so”. Maybe it might happen, but I see it more for extractive purposes. But perhaps that’s me being too regimented in the now, because that’s on the cusp of happening.  That’s the thing about this whole exercise, so much of It is possible and so much of it could happen in the not so far future so it's almost easier science fiction to digest because it is not that far off from reality. | I actually worry that being part of this process – this is a backhanded compliment I guess – I worry that because I loved it so much and I loved engaging with some of these topics and ideas that actually I might find it hard when I go back into the real world of policy making. I'll be like “what do you mean you don’t believe in … you don’t think that nature should have rights?” I certainly think it will inform future work and I actually think it will go even further than that where it might make me frustrated more on engaging with these types of ideas (in a “real world” setting).  I think this group loves these stories, because it is right up our alley, we love the ocean, this is what we work on, these things are nerdy enough that we get it. Whether the learning curve would be too steep for the average person, I don’t know. (…) But as it stands now, I do think it could lead to more engagement with the ocean but there needs to be either simplification of the plot, but I think that would be a loss, so I think they need to be made longer and have that understanding built in up front. |
| 6 | It makes people stop and think differently (…) And then you can unpack it later, unpack it over a glass of wine, a beer and suddenly you're thinking, “oh why didn’t I think of that?” so that’s cool.  (*Regarding reconnection*) I think emotionally it could do that. Because obviously the water is a non-human environment (…) fishing communities that have a livelihood there, that’s quite exceptional, whereas most of us walking around will look at the ocean and like it or go on holiday by the ocean and swim in it but never go out to the high seas or the deep seas so that element chimes with science fiction, because it's actually quite unknown to lots of people. And it's quite scary you know, it’s a long way away, it's dark a lot of the time, it's very deep, its high pressure, so all of these...and it's full of these weird things. And it has synergies with the stories because the stories are a little different and the deep sea is a little different as well. |  | We are particularly working on hydrothermal vents with (…) thinking about how they should be protected and how they should be understood, and I think what's quite nice about story 2 is that some of the lesser known aspects of a black smoker or a chimney, the awesomeness of it, the spirituality of it comes through. I don’t know that anybody has really considered them in that way other than, the world expert is (…) and she is a vent enthusiast, so I guess she has thought about them in that way. | I wonder, but only because I'm an old fuddie duddie, but I wonder how realistic some of these ideas can be to implement.  And also, and that’s a compliment and a criticism, because the world of ocean science and ocean management is quite small, a small community of experts are going to recognize things in those stories because that’s the way they are coming at it, which is great for people that understand some of these different aspects, whereas (…) somebody without that grounding may struggle. I don’t know, it would be interesting to find out against different age groups, or ethnic groups, people in different parts of society, in your search for feedback. If you could touch on some of these things, it would make it stronger. It would be an interesting thing as well, whether older people from a different cultural set could engage with it. |
| 7 | I mean, I have no idea, anything in there is possible, some of it may seem outlandish, as in like, I have a really hard time imagining that it might happen (…) But when I cast my eyes back to what reality looked like 50 years ago (…) I think anything is possible, because of how far we have come in that time and how quickly things are evolving. (…) I don’t like to narrow my mind, thinking what is possible, who knows?  So I really like the end of the second story, about it being … there are still emotions in there, somewhere, I really liked it, that piece talked to me a lot, maybe because I’m also a strongly emotional person, but ultimately a lot of the time, decisions are made based on emotions, based on intuitive reactions that people have as humans, even if they’re informed by knowledge. (…) I really liked that this very much showed in that story. (*Emphasizes empathy and emotional connections to the story material).* |  | I think perhaps more in the second story, about oceanography and currents and working with satellite data and developing technologies where the time steps are reduced, deploying technologies on the ocean as well, working with drones and things like that. Those technological aspects, for sure. The first story, because it is more undersea and also more connecting with the ecology, I’m less familiar with, I recognize it from reading the literature broadly and from conversations I had with colleagues who work on these things, but that’s why I say, using broader knowledge, I totally recognize things.  I don’t know actually about living underwater, but a small experiment of that was trialed, right, and continues to be trialed. For sure some of the research on the nodules, at a broad level, is also ongoing. Similarly, the first part of the second story, where people are trying to cook different things, makes me think of lionfish. (…) So elements of the pieces reminded me of some things I’m familiar with, in the present very much. Similarly, some of the technological advances, that were highlighted, that are ongoing, and are also in movies, holograms and things like that. They are entry points to the stories that people can relate to based on present experiences. | I won’t engage as deeply as you have (…) As in, I work with scenarios, but I think the work that I do around scenarios is less science fiction, it borrows from science fiction but it's still more rooted in… I don’t want to say reality but it's something that individuals connect with more on a daily basis, particularly for policy makers or some of the folks whom I work with, science fiction, they find it a lot harder to engage with.  The piece where I struggle is that people still oftentimes see it as too outlandish, or its too far removed from our reality, and that’s a good excuse not to engage with it (…) people say it's never going to happen because it’s a science fiction story. Or if it’s a really positive dimension of how we might be able to address something, the excuse is like, “to get us there, we would need, XYZ, it's totally unrealistic right now.” But I push back against that a little bit by saying, “well even if you don’t take it to that level, to that degree of extreme, even a middle point, what would we need to achieve that and at least have it as an exercise.” (…) you need to have people that are a little bit willing to take risks, emotionally, mentally.  (*Regarding a reconnection*) The high seas in particular, I don’t know, I think it's rather the oceans in general. |
| 8 | I never really thought about the future of the high seas. I spent my career trying to protect the ocean, so I'm always in the here and now, like deep sea mining is going to happen, we have to stop it. (…) And it's quite a pessimistic view given everything that’s happening (…) So, it is interesting to imagine how we might occupy the ocean in the future, so this has been very engaging and insightful.  It’s a different way of engaging people in the ocean and creating that sort of awe and fascination with the ocean. When I was young, I read 20000 leagues under the sea – and that’s also kind of science fiction – I found that fascinating and it really fueled my imagination, so I think that people who don’t know anything about the ocean but might be into radical storytelling might be enthralled by these kinds of stories and it makes them look at the ocean differently. If they like Star Trek or whatever, Star Wars, that could inspire people to study physics or astrophysics or astronomy in a similar way these kinds of stories could inspire people to learn more about the ocean, become marine scientists (…) It might make people want to explore the ocean, even if they’re not near the ocean, living inland somewhere, reading these stories might make them think “oh I want to see the ocean”. But again that doesn’t always have to take the form of science fiction, there are other types of storytelling that can inspire people but this is certainly one way of engaging people, new audiences. | Everything that you learn and everything you’re exposed to, it helps to shape your viewpoint, so I'm sure I will take some of this in my work going forward in how I might communicate the future of the ocean | The second story is about displacement of people, which is pretty similar to what's happening now and has always happened to people through crisis.  So, there is the underwater station that already exists, not elaborate, and I’ve read about plans for them. And we've discussed a deep-sea station in the workshops. And for the IUU fishing story, that’s how illegal fishers operate now, they turn off existing technology, VMS, AIS, to go under the radar when they fish, so obviously it's more high-tech in your story, but it's similar in that they switch off the technology in order to operate and not be caught. So that’s very much based on present day.  But in this, it's very plausible that we will be microchipped, they already have google glasses that show you everything, so that’s very much an extension of what already exists.  And in the second story, I found it quite fascinating, if we mess up to the point where it (*the planet*) becomes uninhabitable which is not unimaginable, which is just an extrapolation of where we are at right now, then maybe we do find ourselves moving into the sea and maybe some of us space and some of us move to the ocean.  And I was interested in how fish evolve really quickly; I don’t think that’s unrealistic because it's also happening now (…) There is evidence, I've seen papers about the evolution being accelerated in fish that are overfished. So, for example in the north Atlantic there are reports of fish that have been historically overfished and to adapt, they are reproducing at a younger age and they don’t get to the same big size anymore so it's kind of an adaptation to overfishing. So, in your story this evolution is not unrealistic, we will see some kind of speeded up evolution, whether it's as fast as you describe it in your story, I don’t know, time will tell. | About the fourth story, I spent much of my career fighting against illegal fishing, but it's not familiar to me because he jumps off the ship in the end, he doesn’t follow through in the end. I mean it's not unrealistic, that could happen, but it's not related to me, I've never … |

**Supplementary Information 5**

Table 10. Story elements of “The Ocean Uprising” and their relation to currently prevalent imaginaries. This relation is shown by referencing scientific or grey literature, which is listed below.

| Story Element | Interview Quote | Relation to Realities/ Imaginaries |
| --- | --- | --- |
| The seafloor is privatized and is now owned by geo-engineering corporations | *“The idea that private entities ended up grabbing all the seafloor – I absolutely think that might happen. (…) But I see it more for extractive purposes. Perhaps that’s me being too regimented in the now because that’s on the cusp of happening.” (Participant 5)* | Networks of private actors are gaining influence, either in coalition or in conflict with other governance organizations (4).  Corporations and markets innovate and develop fast, outpacing the ability of societal and political actors to adapt to them (1,2,3), hence, corporate actors might use governance loopholes on the High Seas to acquire areas there.  Corporate actors have recently been granted licenses to explore and mine the seabed (5). Scholars have described the ongoing and increasing privatization of the ocean (9). Ocean geo-engineering specifically has been debated by scientific and policy institutions (6,7,8,82). |
| The High Seas are temporarily inhabited by workers of high-profile jobs and wealthy tourists | *“I hope that we don’t colonize the High Seas (…) (Participant 4)* | Industrial activities on the oceans spark concerns about ‘ocean grabbing’, depriving small scale users of resources (10,11). The Global South might be wary of ocean imperialism or neo-colonialism, as Global North industrial nations take control of the High Seas and its resources (12). |
| Corporations manage their area of the seafloor sustainably, for profit | *“When these companies are doing conservation and management of their areas, they are actually acting, in an effective way, at least they had a plan for this particular thing. And this you can see in FIPs, fisheries improvement projects, that a lot of stakeholders and industry are engaging with.” (Participant 4)* | Corporations have developed ambitious sustainability projects, organizations and reports (14, 15, 1), suggesting that industry actors could be furthering sustainability. Yet this is often done to further the business and less due to intrinsic concerns for the ocean. There are many forms of monetary incentives for nature conservation (16, 17,18). Ecotourism can contribute to local and national economies and conservation, when done sustainably (13) |
| An activist group uses disruptive measures to fight for change | “*She is nodding back to her previous life where she used to do all these things that NGOs do now, and you see the same kinds of narratives, eco activists or eco terrorists.” (Participant 5)* | Throughout history, various forms of disruptive activism (including the destruction of property) have been successful in triggering lasting change (19). Disruptive activism groups today are using disruptive tactics such as blockades and strikes (20,21,22,23) |
| The disruptive activism group embraces the label ‘eco-pirates’ appreciating radical, anarchist, values |  | Historically, maritime societies were a breeding ground for social movements, specifically a ‘maritime radicalism’, which was characterized by collectivism, anti-authoritarianism and egalitarianism and connected revolutionary impulses in the United States, France and Haiti (24). These values and the transnational coalitions that spread them are models for today’s globalized anti-racist and anti-capitalist protests (25). These values could be appealing for a young activism group. |
| A collaborative art project connects people to the ocean on an emotional level, which sets the stage for transformative change |  | Creative and imaginative participatory projects (e.g. art-science collaborations) can build capacities for transformative change and deeply engage participants (26,27), depicting an ecosystem using art can decrease psychological distance, increasing awareness and care (28). Stories and visual art can be used to communicate ocean issues (29), which has been recognized by the Decade of Ocean Science, which calls for art-science collaboration (30,31). |
| The disruptive activism group now work as tour guides, aiming to decolonize the ocean imaginary |  | Marine cultural heritage (specifically artifacts from ships transporting enslaved people across the middle passage) proves that the ocean is neither ahistorical nor apolitical (32). The future of the ocean will have to be negotiated amid calls for decolonization (33). |
| People work successfully to partially reverse anthropogenic damage to nature |  | Various marine restoration initiatives exist and there is evidence for successful marine restoration projects (34, 35). The IPCC suggests marine habitat restoration tools such as coral gardening as potentially locally effective (36). Successful implementation of marine protected areas can lead to the recovery of fish stocks (37,38). Ocean based mitigation options could reduce global greenhouse gas emissions with a possible option to enhance this being carbon storage in the seabed (39). |

Table 11. Story elements of “Deep Connections” and their relation to currently prevalent imaginaries

| Story Element | Interview Quote | Relation to Realities/ Imaginaries |
| --- | --- | --- |
| After an environmental catastrophe leaves their homeland uninhabitable, a group of people migrates to the deep sea | *“If we mess up to the point where it (the earth’s surface) becomes uninhabitable which is not unimaginable, which is just an extrapolation of where we are at right now, then maybe we do find ourselves moving into the sea.” (Participant 8)* | There are various designs for an underwater city (40,41,42) and people have spent days and weeks underwater, for example in research stations (43). The IPCC reports that an estimated 700 million people may experience displacement due to anthropogenic climate change in Africa alone (44), which suggests that many climate migrants will search for new homelands in the future. It seems possible that people might adapt to the changed environmental conditions, as evidence of physiological adaptations to spending time underwater exist (45). |
| Hydrothermal vents are seen as sacred in their culture | *“We are working on hydrothermal vents, thinking about how they should be protected and understood, and I think what's quite nice about the story is that the awesomeness of it, the spirituality of it comes through.” (Participant 6)* | There are various examples of peoples deeply spiritual connections to the landscape (46,47,48,49).  (Volcanic) mountains are viewed as sacred by many cultures and religions all over the world (50), it therefore seems plausible that the deep-sea dwellers would view a hydrothermal vent as sacred and feel deeply connected to this seascape. |
| Humans want to learn from octopi about how they engage with the world | *“I also liked the part about the octopus, how we view the world and gather information could be really, really different.” (Participant 2)* | Octopi have over 500 million neurons, over two thirds of these neurons are located within their arms and body (51), which suggests that they experience the world differently. This could be linked to the notion of embodied knowledge (52), the uptake of which is assumed to be able to reconnect humans to the biosphere (53). The interest in animal experiences displayed by the protagonists could already be a sign of this kind of knowledge and learning, of a reconnection. |
| Natural resources are gathered where they are naturally occurring, without using destructive methods | *“And what I really liked was your thing about the non-renewable resources seeping out rather than needing destructive methods, they were just collecting.” (Participant 2)* | About 46 percent of all oil that is released into the ocean stems from natural seeps (54), there are numerous methane seeps on the seafloor (55) and polymetallic nodules rich in valuable metals can be found on the seafloor (56). Experiments testing various technologies to collect these nodules have been conducted (57), hence it might be possible that future technologies allow for collecting resources rather than extracting them. |
| Human genome editing is employed to allow adaptation of humans to their new deep-sea habitat |  | Many deep-sea organisms have specifically adapted to the conditions of the deep sea (58). Human genome editing is theoretically possible (59) and has been thought through in various science fiction works (60). Influential science (fiction) writer Isaac Asimov wrote *“The advance of genetic engineering makes it quite conceivable that we will begin to design our own evolutionary progress” (61)* |
| The deep-sea dwellers have moved away from dualisms, such as human/animal or man/woman |  | Some scholars point to dualist conceptualizations (specifically nature/culture) as a destructive principle of thought in modern science (62,63). Such conceptualizations have been challenged in sustainability science (64), which suggests that people deeply connected to their surrounding ecosystem would abandon these dichotomies. |
| They (unsuccessfully) work to convert energy derived from chemosynthesis into electricity |  | Bacteria living on hydrothermal vents produce energy via chemosynthesis (65). People have been searching for clean energy resources, to achieve less pollution, without decreasing the use of energy. There are diverse methods to derive clean energy from the oceans (66,67). It seems plausible that humans would aim to convert energy derived from chemosynthesis into electricity. |

Table 12. Story elements of “Kairei City” and their relation to currently prevalent imaginaries

| Story Element | Interview Quote | Relation to Realities/ Imaginaries |
| --- | --- | --- |
| People live in a city, floating on the High Seas | *“Then we can maybe get to the sea steading, where we have the floating cities, when the islands have been subjected to sea level rise.” (Participant 2)* | There exist various designs for floating cities (68), and the idea has been discussed at a United Nations Roundtable (69). Further, the Seasteading Institute organizes conferences, has published a book, and experimented with the first seastead, which was successfully built and lived in in 2019 (70,71). The idea has been critically discussed, since many prominent sea steading proponents are wealthy entrepreneurs, who aim to create capitalist, libertarian utopias (72). |
| All human-built structures (such as protected areas, aquaculture farms, kelp forests, the floating city itself) are moved around to adapt to changing environmental conditions | *“Shared fish, dynamic resources, nothing is fixed, and they manage things more mobile, which is close to what I do. So that was fun to see.” (Participant 3)* | Clearly demarcated boundaries, territorializing ocean space, have been critiqued as being social constructs, with little attendance to the ocean’s materiality (73,74). This suggests more dynamic management of ocean space and resources, which has been proposed for (transboundary) fish stocks (75,76) or marine protected areas (77). |
| The High Seas are governed as a nation state | *“And there is this big institution that is taking care of international waters” (Participant 4)* | Fragmented ocean governance arrangements oftentimes fail to provide integrated responses to risks, for example climate-related changes (36), which suggests a need for integrated ocean governance (78), which is attempted in the BBNJ process (82). Due to the insufficiency of current ocean governance, scholars have argued for a rule setting ‘meta institution’ (79), a role that could be filled by a nation state, especially since a nation state could provide binding environmental law and participation in international negotiations (80). |
| The concept of RFMOs (Regional Fisheries Organizations) is improved, by uniting these organizations and bestowing them with more power | *“It was interesting to see how there were some elements in that RFMO that are not actually included in today's RFMOs mandates.” (Participant 4)* | RFMOs have been critiqued since they have limited power to enforce rules, are fragmented, and membership of countries is voluntary (83). A united RFMO enforcing binding law as a powerful state organization could solve these issues. |
| Seaweed is farmed on an industrial scale and is used as food, packaging or fuel |  | Seaweed can be used as food or as packaging material, combating plastic pollution (84). Further algal biofuel has been found to be possible and sustainable (85). Further, offshore seaweed production could potentially contribute towards climate mitigation via long term storage of carbon in ocean sediments (86,84). |
| United Nations processes are not ambitious enough to halt environmental degradation, specifically climate change |  | The UN has met for 27 conferences of the parties, yet climate change is exacerbating, and countries are still investing in fossil fuel extraction (19,44). Despite continuous talks about keeping climate change to 1,5 degrees maximum, current nationally determined contributions would lead to a warming of 2,7 degrees by 2100. The nationally determined contributions of all nations combined deliver only one-eighth of the emissions reduction needed to limit global warming to 1,5 degrees (87). The NDCs contain only intended reduction measures, not actual measures. Thus, the UN process is not ambitious enough to halt climate change. |
| The High Seas society experiences a resurgence of traditional and indigenous knowledge (specifically regarding shipping) |  | Indigenous knowledge about High Seas (instrument free) navigation is recognized as relevant to governance (88,89). |
| The High Seas is recognized as a legal entity, following the rights of nature approach |  | The rights of nature approach is based on an emphasis of the interconnectedness between humans and nature (90,92) and a view of nature as a partner, not as property and resource. The approach aims to gives a voice to nature, as it states that all humans have the right and the obligation to protect the environment (90). There are cases in which ecosystems have been granted legal personhood, based on this approach (91). |

Table 13. Story elements of “Myopia” and their relation to currently prevalent imaginaries

| Story Element | Interview Quote | Relation to Realities/ Imaginaries |
| --- | --- | --- |
| All environmental data has to be shared publicly, leading to a ‘transparent ocean’ | *“When you described the sharing of scientific data and a fully transparent ocean, that made complete sense. (…) sharing data has been the cornerstone of research for Antarctica since the sixties.” (Participant 1)* | Various technologies for control, surveillance and monitoring have been proposed and employed to combat illegal, unreported and unregulated fishing and slavery (93,95), and to enhance transparency in the seafood value chain and further biodiversity conservation (94,96). This transparency and traceability drive accountability and better sustainability performance of companies (1). Data sharing platforms and technologies allow for dissemination of the transparent data (97,98,99). It seems plausible that transparent data collection and sharing could become mandatory in the future. |
| The narrator wears an implant consisting of sensors and data processors, allowing him to see data streams ‘with his own eyes’ | *“It's very plausible that we will be microchipped, they already have Google glasses that show you everything, so that’s very much an extension of what already exists.” (Participant 8)* | Transhumanist conceptualizations have a long history (103) and there is even a specific journal on posthuman studies (104). Further, there are examples of technologies which are ‘added’ to the human body to enhance its capabilities (101,102). |
| Some people defy the transparency laws and try to engage in illegal activities in secrecy | *“And for the IUU fishing story, that’s how illegal fishers operate now, they turn off existing technology, VMS, AIS, to go under the radar when they fish.” (Participant 8)* | Vessels can turn off their automatic identification system (AIS), this ‘dark’ AIS oftentimes illustrates some degree of illegal behavior (94). Ships can also project false AIS tracks, which differ from their actual position (106). Yet, new radar techniques are being developed and can spot vessels, which are ‘dark fishing’ without AIS (105). |
| Fish are evolving much faster, changing morphology, migration, and behavior | *“And I was interested in how fish evolve really quickly. (…) There is evidence, I've seen papers about the evolution being accelerated in fish that are overfished.” (Participant 8)* | Animals evolve faster due to increased human pressures (107). For example, high fishing pressure leads fish to evolve to reproduce when they are younger and smaller, and they thus tend to have fewer, smaller offspring. |
| Citizen science increases, citizens care about environmental changes and report them |  | The Decade of Ocean Science offers an inclusive approach for citizens to submit potential ‘Decade Activities’ to engage in knowledge production (108). Various citizen science projects have been proposed, for example surfers sharing geotagged pictures of ocean developments using a new app (109). |
| The ocean is full of sensors, every inch of the High Seas is monitored at all times |  | There are a multitude of monitoring technologies already, including Argo, a collaborative project sampling the oceans using approximately 4000 autonomous floats (112), AniBos, which uses tags on animals to track migrating fish stocks (111), or projects using cameras, either attached to underwater structures or floating, which detect and differentiate fish species (113). Camera equipped drones and satellite-based identification systems are used to identify vessels (114,115). While technologies using global positioning systems (GPS) and acoustic data can locate schools of fish as well as their biomass and species composition (116). It seems plausible that a continued evolution of these technologies could lead to a completely monitored ocean. |
| The intensive use of remote sensing creates distance from the research object or subject, creating a false sense of objectivity |  | Remote sensing technologies can be understood as technologies of abstraction, as they show the ocean as a field of data, ignoring the oceans materiality and complexity (117,118). They further distance researchers from the embodied encounter with the object or subject of their study, which can lead to a false sense of objectivity, even though ‘every view is a view from somewhere’ (117). Remote sensing technologies tend towards the criminalization of fishers by focusing on the imagery of specific events in time rather than understanding the root cause of illegal practices (94). |
| The protagonist describes the High Seas as “demystified”, changed from a place of endless wonder to strings of data |  | Using advanced technologies, the ocean is transformed into data, subjecting it to regimes of control and management (117,119), affecting how humans imagine the oceans (118). Scholars in 1934 wrote ‘“Fantastic tales about the life in the ocean were gradually replaced by accurate knowledge (…)in the advance of scientific knowledge the romance and adventure of the old days associated with the great oceanic expeditions have been lost…’ (120) an emotion that is likely to intensify as we study the ocean with more advanced technologies. |

*Literature cited in tables*

**1**.United Nations Global Compact. (2020). Ocean stewardship 2030. Ten ambitions and recommendations for growing sustainable ocean business.

**2**.Taquet, M. (2013). Fish aggregating devices (FADs): good or bad fishing tools? A question of scale and knowledge. *Aquatic Living Resources*, *26*(1), 25–35. https://doi.org/10.1051/ALR/2013043

**3**.Merrie, A. (2016). Global ocean futures: Governance of marine fisheries in the Anthropocene. (Doctoral Dissertation). Stockholm Resilience Centre, Stockholm University. Retrieved from http://www.diva-portal.org/URN: urn:nbn:se:se:diva-127618

**4**.Dauvergne, P., & Clapp, J. (2016). Researching global environmental politics in the 21st century. *Global Environmental Politics*, *16*(1), 1–12. https://doi.org/10.1162/GLEP_E_00333

**5.**Dingwall, J. (2021). International law and corporate actors in deep seabed mining. *Oxford University Press*. https://doi.org/10.1093/OSO/9780192898265.001.0001

**6**.Galaz, V. (2012). Geo-engineering, governance, and social-ecological systems: Critical issues and joint research needs. *Ecology and Society*, *17*(1). https://doi.org/10.5751/ES-04677-170124

**7.**Barry, J. P., Buck, K. R., Lovera, C., Brewer, P. G., Seibel, B. A., Drazen, J. C., Tamburri, M. N., Whaling, P. J., Kuhnz, L., & Pane, E. F. (2013). The response of abyssal organisms to low pH conditions during a series of CO2-release experiments simulating deep-sea carbon sequestration. *Deep Sea Research Part II: Topical Studies in Oceanography*, *92*, 249–260. https://doi.org/10.1016/J.DSR2.2013.03.037

**8**.Secretariat of the Convention on Biological Diversity. (2012). Geoengineering in relation to the Convention on Biological Diversity: Technical and regulatory matters. *Montreal, Technical Series No. 66, 152 Pages.*

**9.**Schlüter, A., Bavinck, M., Hadjimichael, M., Partelow, S., Said, A., & Ertör, I. (2020). Broadening the perspective on ocean privatizations: An interdisciplinary social science enquiry. *Ecology and Society*, *25*(3), 1–12. https://doi.org/10.5751/ES-11772-250320

**10.**Bennett, N. J., Govan, H., & Satterfield, T. (2015). Ocean grabbing. *Marine Policy*, *57*, 61–68. https://doi.org/10.1016/J.MARPOL.2015.03.026

**11.**Ertör, I., & Hadjimichael, · M. (2020). Editorial: Blue degrowth and the politics of the sea: Rethinking the blue economy. *Sustainability Science*, *15*, 1–10. https://doi.org/10.1007/s11625-019-00772-y

**12**.Robinson, S. (2021). Scientific imaginaries and science diplomacy: The case of ocean exploitation. *Centaurus*, *63*(1), 150–170. https://doi.org/10.1111/1600-0498.12342

**13.**Cisneros-Montemayor, A. M., Becerril-García, E. E., Berdeja-Zavala, O., & Ayala-Bocos, A. (2020). Shark ecotourism in Mexico: Scientific research, conservation, and contribution to a blue economy. *Advances in Marine Biology*, *85*(1), 71–92. https://doi.org/10.1016/BS.AMB.2019.08.003

**14.**SeaBos. (n.d.). SeaBOS *–* Connecting science with industry leaders for biosphere stewardship. Retrieved May 12, 2022, from https://seabos.org/

**15**.Marine Stewardship Council. (n.d.). Fishery Improvement Projects (FIPs*)*. Retrieved May 12, 2022, from https://www.msc.org/for-business/fisheries/developing-world-and-small-scale-fisheries/fips

**16**.Horlings, E., Schenau, S., Hein, L., Lof, M., de Jongh, L., & Polder, M. (2020). Experimental monetary valuation of ecosystem services and assets in the Netherlands. *CBS: Den Haag/Heerlen, The Netherlands*

**17**.Kaiser, J., Haase, D., Krueger, T. (2021). Payments for ecosystem services: A review of definitions, the role of spatial scales, and critique. *Ecology and Society 26(2):12*. https://doi.org/10.5751/ES-12307-260212

**18**.Hahn, T., Mcdermott, C., Ituarte-Lima, C., Schultz, M., Green, T., & Tuvendal, M. (2015). Purposes and degrees of commodification: Economic instruments for biodiversity and ecosystem services need not rely on markets or monetary valuation. *Ecosystem Services. Volume 16, December 2015, Pages 74-82.* https://doi.org/10.1016/j.ecoser.2015.10.012

**19.**Malm, A. (2021). How to blow up a pipeline: learning to fight in a world on fire. *Durnell Marston*.

**20.**Ende Gelände. (n.d.). Ende Gelände – Kohle stoppen. Klima schützen! Retrieved May 12, 2022, from https://www.ende-gelaende.org/

**21**.Fridays For Future. (n.d.). Fridays For Future is an international climate movement active in most countries and our website offers information on who we are and what you can do*.* Retrieved May 12, 2022, from https://fridaysforfuture.org/

**22**.Extinction Rebellion. (n.d.). Extinction Rebellion. Join the fight against climate and ecological collapse. Retrieved May 12, 2022, from https://rebellion.global/

**23.**Greenpeace International. (n.d.). Greenpeace International. Retrieved May 12, 2022, from https://www.greenpeace.org/international/

**24.**Frykman, N., Anderson, C., Heerma Van Voss, L., & Rediker, M. (2013). Mutiny and maritime radicalism in the age of revolution: An introduction. *International Review of Social History* (Vol. 58, pp. 1–14). Cambridge University Press. https://doi.org/10.1017/S0020859013000497

**25**.Allison, E. H., Kurien, J., Ota, Y., Adhuri, D. S., Bavinck, J. M., Cisneros-Montemayor, A., Fabinyi, M., Jentoft, S., Lau, S., Mallory, T. G., Olukoju, A., van Putten, I., Stacey, N., Voyer, M., & Weeratunge, N. (2020). The human relationship with our ocean planet summary for decision-makers. September 2020–2024.

**26.**Galafassi, D., Tàbara, J. D., & Heras, M. (2018). Restoring our senses, restoring the Earth. Fostering imaginative capacities through the arts for envisioning climate transformations. *Elementa*, *6*. https://doi.org/10.1525/ELEMENTA.330/112852

**27.**Pereira, L., Sitas, N., Ravera, F., Jimenez-Aceituno, A., & Merrie, A. (2019). Building capacities for transformative change towards sustainability: Imagination in intergovernmental science-policy scenario processes. *Elementa: Science of the Anthropocene*, *7*. https://doi.org/10.1525/elementa.374

**28.**Schuldt, J. P., McComas, K. A., & Byrne, S. E. (2016). Communicating about ocean health: Theoretical and practical considerations. *Philosophical Transactions of the Royal Society B: Biological Sciences* (Vol. 371, Issue 1689). Royal Society of London. https://doi.org/10.1098/rstb.2015.0214

**29.**Merrie, A., Keys, P., Metian, M., & Österblom, H. (2018). Radical ocean futures-scenario development using science fiction prototyping. *Futures*, *95*, 22–32. https://doi.org/10.1016/j.futures.2017.09.005

**30**.European Marine Board. (2021). Embracing the ocean - Ocean Decade. Retrieved May 12, 2022, from https://www.oceandecade.org/news/embracing-the-ocean/

**31.**The Hydrous. (n.d.). The Hydrous presents: The decade of ocean empathy - Ocean Decade. Retrieved May 12, 2022, from https://www.oceandecade.org/actions/the-hydrous-presents-the-decade-of-ocean-empathy/

**32**.Lehman, J. (2018b). Marine cultural heritage: frontier or centre? *International Social Science Journal*, *68*(229–230), 291–301. https://doi.org/10.1111/issj.12155

**33.**Vásquez-Fernández, A. M., & Ahenakew pii tai poo taa, C. (2020). Resurgence of relationality: reflections on decolonizing and indigenizing ‘sustainable development.’ *Current Opinion in Environmental Sustainability*, *43*, 65–70. https://doi.org/10.1016/J.COSUST.2020.03.005

**34.**Duke Restore. (2022). Duke Restore. Retrieved May 12, 2022, from https://sites.nicholas.duke.edu/dukerestore/

**35.**Saunders, M. I., Doropoulos, C., Bayraktarov, E., Babcock, R. C., Gorman, D., Eger, A. M., Vozzo, M. L., Gillies, C. L., Vanderklift, M. A., Steven, A. D. L., Bustamante, R. H., & Silliman, B. R. (2020). Bright spots in coastal marine ecosystem restoration. *Current Biology: CB*, *30*(24), R1500–R1510. https://doi.org/10.1016/J.CUB.2020.10.056

**36.**IPCC. (2019). Summary for Policymakers. In: IPCC Special Report on the Ocean and Cryosphere in a Changing Climate. Pörtner, H.O., Roberts, D.C., Masson-Delmotte, V., Zhai, P., Tignor, M., Poloczanska, E., Mintenbeck, K., Alegría, A., Nicolai, M., Okem, A., Petzold, J., Rama, B., & Weyer, N.M. (eds.). In press.

**37**.Aburto-Oropeza, O., Erisman, B., Galland, G. R., Mascareñas-Osorio, I., Sala, E., & Ezcurra, E. (2011). Large recovery of fish biomass in a no-take marine reserve. *PLoS ONE*, *6*(8). https://doi.org/10.1371/journal.pone.0023601

**38**.Hammer, C., Kjesbu, O. S., Kruse, G. H., & Shelton, P. A. (2010). Rebuilding depleted fish stocks: Biology, ecology, social science, and management strategies. *ICES Journal of Marine Science*, *67*(9), 1825–1829. https://doi.org/10.1093/ICESJMS/FSQ039

**39.**Hoegh-Guldberg, H., Caldeira, K., & Chopin, T. (2019). The Ocean as a solution to climate change: Five opportunities for action. *Washington, DC: World Resources Institute*. Available online at http://www.oceanpanel.org/climate

**40**.Pauley, P. (2021). Phil Pauley innovation consultant. Retrieved May 12, 2022, from http://philpauley.com/

**41**.Shimizu Corporation. (n.d.). Ocean spiral. Deep sea future city concept. Retrieved May 12, 2022, from https://www.shimz.co.jp/en/topics/dream/content01/

**42**.Zigloo Studio Inc. (2021). Gyre seascraper*.* Retrieved May 12, 2022, from https://www.zigloostudio.com/gyre-seascraper.html

**43.**Florida International University. (2022). About Aquarius, Institute of Environment, Florida International University. Retrieved May 12, 2022, from https://environment.fiu.edu/aquarius/about/

**44.**IPCC. (2022). Summary for Policymakers. In: Climate Change 2022: Impacts, Adaptation, and Vulnerability. Contribution of Working Group II to the Sixth Assessment Report of the Intergovernmental Panel on Climate Change. Pörtner, H.O., Roberts, D.C., Tignor, M., Poloczanska, E.S., Mintenbeck, K., Alegría, A., Craig, M., Langsdorf, S., Löschke, S., Möller, V., Okem, A., & Rama, B. (eds.). *Cambridge University Press*. In Press

**45**.Ilardo, M. A., Moltke, I., Korneliussen, T. S., Cheng, J., Stern, A. J., Racimo, F., de Barros Damgaard, P., Sikora, M., Seguin-Orlando, A., Rasmussen, S., van den Munckhof, I. C. L., ter Horst, R., Joosten, L. A. B., Netea, M. G., Salingkat, S., Nielsen, R., & Willerslev, E. (2018). Physiological and genetic adaptations to diving in sea nomads. *Cell*, *173*(3), 569-580.e15. https://doi.org/10.1016/j.cell.2018.03.054

**46**.Tengö, M., & von Heland, J. (2011). Adaptive capacity of local indigenous institutions: The case of the taboo forests of southern Madagascar. *Adapting Institutions: Governance, Complexity and Social-Ecological Resilience*, 37–74. https://doi.org/10.1017/CBO9781139017237.006

**47**.Allison, E. (2015). Religion inscribed in the landscape: Sacred sites, local deities and natural resource use in the Himalayas. *The Changing World Religion Map: Sacred Places, Identities, Practices and Politics*, 439–459. https://doi.org/10.1007/978-94-017-9376-6_22

**48.**Allison, E. (2019). Spirituality and ecology. *The Routledge International Handbook of Spirituality in Society and the Professions*, 59–66. https://doi.org/10.4324/9781315445489_7

**49.**Bovensiepen, J. (2009). Spiritual landscapes of life and death in the central highlands of East Timor. *Anthropological Forum*, *19*(3), 323–338. https://doi.org/10.1080/006646709032784371

**50.**Bernbaum, E. (2006). Sacred mountains - themes and teachings. *Mountain Research and Development*, *26*(4), 304–309. https://doi.org/10.1659/0276-4741(2006)26[304:SMTAT]2.0.CO;2

**51**.Gutnick, T., Zullo, L., Hochner, B., & Kuba, M. J. (2020). Use of peripheral sensory information for central nervous control of arm movement by octopus vulgaris. *Current Biology: CB*, *30*(21), 4322-4327.e3. https://doi.org/10.1016/J.CUB.2020.08.037

**52.**Tanaka, S. (2011). The notion of embodied knowledge. *Theoretical Psychology: Global Transformations and Challenges: Chapter 15.* *(pp. 149-157). Captus Press.* P. Stenner, J., Cromby, J., Motzkau, J., Yen, Y. & Haosheng. (eds). https://doi.org/10.4442/ENCY_37_13_03

**53**.Cooke, B., West, S., & Boonstra, W. J. (2016). Dwelling in the biosphere: exploring an embodied human–environment connection in resilience thinking. *Sustainability Science*, *11*(5), 831–843. https://doi.org/10.1007/S11625-016-0367-3

**54**.National Research Council. (2002). Oil in the sea III: Inputs, fates, and effects. *Washington (DC): National Academies Press (USA).* https://doi.org/10.17226/10388

**55**.Judd, A. G. (2004). Natural seabed gas seeps as sources of atmospheric methane. *Environmental Geology*, *46*(8 SPEC.ISS.), 988–996. https://doi.org/10.1007/S00254-004-1083-3/TABLES/3

**56.**International Seabed Authority. (2022). Minerals: Polymetallic nodules, polymetallic nodule contractors. Retrieved May 12, 2022, from https://www.isa.org.jm/exploration-contracts/polymetallic-nodules

**57**.Kang, Y., & Liu, S. (2021). The development history and latest progress of deep-sea polymetallic nodule mining technology. *Minerals 2021, Vol. 11, Page 1132*, *11*(10), 1132. https://doi.org/10.3390/MIN11101132

**58.**Jebbar, M., Franzetti, B., Girard, E., & Oger, P. (2015). Microbial diversity and adaptation to high hydrostatic pressure in deep-sea hydrothermal vents prokaryotes. *Extremophiles*, *19*(4), 721–740. https://doi.org/10.1007/S00792-015-0760-3/FIGURES/3

**59**.Royal Swedish Academy of Sciences. (2020). *The Nobel Prize in chemistry 2020 - Press release*.

**60**.So, D., Crocker, K., Sladek, R., & Joly, Y. (2021). Science fiction authors’ perspectives on human genetic engineering. *Medical Humanities*. https://doi.org/10.1136/MEDHUM-2020-012041

**61**.Asimov, I. (1977). The beginning and the end */* (1st ed.). *Doubleday.*

**62**.Gaard, G. (2017). Posthumanism, ecofeminism, and inter-species relations. *MacGregor S (ed) Routledge Handbook of Gender and Environment. Routledge, London*

**63.**Mathews, F. (2017). The dilemma of dualism. *MacGregor S (ed) Routledge Handbook of Gender and Environment. Routledge, London*

**64.**West, S., Haider, L. J., Stålhammar, S., & Woroniecki, S. (2020). A relational turn for sustainability science? Relational thinking, leverage points and transformations. *Ecosystems and People*, *16*(1), 304–325. https://doi.org/10.1080/26395916.2020.1814417

**65**.Enrich-Prast, A., Bastviken, D., Crill, P., Santoro, A. L., Signori, C. N., & Sanseverino, A. M. (2014). Chemosynthesis. *Reference Module in Earth Systems and Environmental Sciences*. https://doi.org/10.1016/B978-0-12-409548-9.09054-0

**66.**Melikoglu, M. (2018). Current status and future of ocean energy sources: A global review. *Ocean Engineering*, *148*, 563–573. https://doi.org/10.1016/J.OCEANENG.2017.11.045

**67**.Hossain, A., Azhim, A., Jaafar, A. B., Musa, M. N., Zaki, S. A., & Fazreen, D. N. (2013). Ocean thermal energy conversion: The promise of a clean future. *CEAT 2013 - 2013 IEEE Conference on Clean Energy and Technology*, 23–26. https://doi.org/10.1109/CEAT.2013.6775593

**68**.Gibson, E. (2019). *BIG unveils floating Oceanix City that can withstand hurricanes*. Retrieved May 12, 2022, from https://www.dezeen.com/2019/04/04/oceanix-city-floating-big-mit-united-nations/?fbclid=IwAR0xyTq3TXWsx34gk254mqSisKvWbMXdplMnfz3CdtqZJ-JWGhMeNgaw2VM

**69.**United Nations Human Settlements Programme. (2019). Roundtable on floating cities at UNHQ calls for innovation to benefit all. UN-Habitat. Retrieved May 12, 2022, from https://unhabitat.org/roundtable-on-floating-cities-at-unhq-calls-for-innovation-to-benefit-all

**70**.Quirk, J., & Friedman, P. (2017). Seasteading: how floating nations will restore the environment, enrich the poor, cure the sick, and liberate humanity from politicians. *Free Press*

**71**.Seasteading Institute. (2021). About – The Seasteading Institute. Retrieved May 12, 2022, from https://www.seasteading.org/about/

**72**.Steinberg, P. E., Nyman, E., & Caraccioli, M. J. (2012). Atlas swam: Freedom, capital, and floating sovereignties in the seasteading vision. *Antipode*, *44*(4), 1532–1550. https://doi.org/10.1111/j.1467-8330.2011.00963.x

**73**.Acton, L., Campbell, L. M., Cleary, J., Gray, N. J., & Halpin, P. N. (2019). What is the Sargasso Sea? The problem of fixing space in a fluid ocean. *Political Geography*, *68*, 86–100. https://doi.org/10.1016/J.POLGEO.2018.11.004

**74**.Steinberg, P., & Peters, K. (2015). Wet ontologies, fluid spaces: Giving depth to volume through oceanic thinking*. Society and Space*. *33*(2), 247–264. https://doi.org/10.1068/d14148p

**75.**Palacios-Abrantes, J., Reygondeau, G., Wabnitz, C. C. C., & Cheung, W. W. L. (2020). The transboundary nature of the world’s exploited marine species. *Scientific Reports*, *10*(1). https://doi.org/10.1038/S41598-020-74644-2

**76**.Ortuño Crespo, G., Mossop, J., Dunn, D., Gjerde, K., Hazen, E., Reygondeau, G., Warner, R., Tittensor, D., & Halpin, P. (2020). Beyond static spatial management: Scientific and legal considerations for dynamic management in the high seas. *Marine Policy*, *122*(*November 2019).* https://doi.org/10.1016/j.marpol.2020.104102

**77.**Cashion, T., Nguyen, T., Brink, T. ten, Mook, A., Palacios-Abrantes, J., & Roberts, S. M. (2020). Shifting seas, shifting boundaries: Dynamic marine protected area designs for a changing climate. *PLoS ONE*, *15(11 November).* https://doi.org/10.1371/JOURNAL.PONE.0241771

**78.**Rayfuse, R., & Warner, R. (2008). Securing a sustainable future for the oceans beyond national jurisdiction: The legal basis for an integrated cross-sectoral regime for high seas governance for the 21st century. *International Journal of Marine and Coastal Law*, *23*(3), 399–421. https://doi.org/10.1163/092735208X331845

**79.**Rudolph, T. B., Ruckelshaus, M., Swilling, M., Allison, E. H., Österblom, H., Gelcich, S., & Mbatha, P. (2020). A transition to sustainable ocean governance. *Nature Communications*, *11*(1). https://doi.org/10.1038/s41467-020-17410-2

**80**.Frank, D. J., Hironaka, A., & Schofer, E. (2000). The nation-state and the natural environment over the twentieth century. *American Sociological Review*, *65*(1), 96–116. https://doi.org/10.2307/2657291

**81**.Rayfuse, R., Lawrence, M. G., & Gjerde, K. M. (2008). Ocean fertilisation and climate change: The need to regulate emerging high seas uses. *International Journal of Marine and Coastal Law*, *23*(2), 297–326. https://doi.org/10.1163/092735208X295846

**82.** United Nations General Assembly (2018)International Legally Binding Instrument under the United Nations Convention on the Law of the Sea on the Conservation and Sustainable Use of Marine Biological Diversity of Areas Beyond National Jurisdiction *A/RES/72/249*. undocs.org/A/RES/72/249

**83.**Cullis-Suzuki, S., & Pauly, D. (2010). Failing the high seas: A global evaluation of regional fisheries management organizations. *Marine Policy*, *34*(5), 1036–1042. https://doi.org/10.1016/J.MARPOL.2010.03.002

**84**.Giercksky, E., & Doumeizel, V. (2020). Seaweed revolution. A manifesto for a sustainable future. Retrieved May 12, 2022, from www.seaweedmanifesto.com

**85.**Joshi, M. P., & Thipse, S. S. (2018). An evaluation of algae biofuel as the next generation alternative fuel and its effects on engine characteristics: A review. *International Journal of Mechanical and Production Engineering Research and Development*, *9*(1), 435–440. https://doi.org/10.24247/IJMPERDFEB201942

**86**.Duarte, C. M., Wu, J., Xiao, X., Bruhn, A., & Krause-Jensen, D. (2017). Can seaweed farming play a role in climate change mitigation and adaptation? *Frontiers in Marine Science*, *4*(APR), 100. https://doi.org/10.3389/FMARS.2017.00100/BIBTEX

**87**.den Elzen, M. (2021). UNEP emissions gap report 2021. Retrieved May 12, 2022, from https://www.pbl.nl/en/publicaties/unep-emissions-gap-report-2021

**88.**Vierros, M. K., Harrison, A. L., Sloat, M. R., Crespo, G. O., Moore, J. W., Dunn, D. C., Ota, Y., Cisneros-Montemayor, A. M., Shillinger, G. L., Watson, T. K., & Govan, H. (2020). Considering indigenous peoples and local communities in governance of the global ocean commons. *Marine Policy*, *119*(*September).* https://doi.org/10.1016/j.marpol.2020.104039

**89**.Mulalap, C. Y., Frere, T., Huffer, E., Hviding, E., Paul, K., Smith, A., & Vierros, M. K. (2020). Traditional knowledge and the BBNJ instrument. *Marine Policy*, *122*(*November 2019*), 104103. https://doi.org/10.1016/j.marpol.2020.104103

**90**.Harden-Davies, H., Humphries, F., Maloney, M., Wright, G., Gjerde, K., & Vierros, M. (2020). Rights of nature: Perspectives for global ocean stewardship. *Marine Policy*, *122*, 104059. https://doi.org/10.1016/j.marpol.2020.104059

**91.**New Zealand Ministry of Justice. (2022, April 12). Te Awa Tupua (Whanganui River Claims Settlement) Act 2017 No 7, Public Act *– New Zealand Legislation*. Retrieved May 12, 2022, from https://www.legislation.govt.nz/act/public/2017/0007/latest/whole.html#DLM6831668

**92**.Ford, J. D., Cameron, L., Rubis, J., Maillet, M., Nakashima, D., Willox, A. C., & Pearce, T. (2016). Including indigenous knowledge and experience in IPCC assessment reports. *Nature Climate Change 2016 6:4*, *6*(4), 349–353. https://doi.org/10.1038/nclimate2954

**93**.Chuaysi, B., & Kiattisin, S. (2020). Fishing vessels behavior identification for combating IUU fishing: Enable traceability at sea. *Wireless Personal Communications*, *115*(4), 2971–2993. https://doi.org/10.1007/S11277-020-07200-W

**94**.Toonen, H. M., & Bush, S. R. (2020). The digital frontiers of fisheries governance: fish attraction devices, drones and satellites. *Journal of Environmental Policy and Planning*, *22*(1), 125–137. https://doi.org/10.1080/1523908X.2018.1461084

**95.**Marschke, M., Andrachuk, M., Vandergeest, P., & McGovern, C. (2020). Assessing the role of information and communication technologies in responding to ‘slavery scandals.’ *Maritime Studies*, *19*(4), 419–428. https://doi.org/10.1007/S40152-020-00201-2

**96**.Dunn, D. C., Jablonicky, C., Crespo, G. O., McCauley, D. J., Kroodsma, D. A., Boerder, K., Gjerde, K. M., & Halpin, P. N. (2018). Empowering high seas governance with satellite vessel tracking data. *Fish and Fisheries*, *19*(4), 729–739. https://doi.org/10.1111/FAF.12285

**97**.Cheng, X., & Qu, F. (2021). Ocean data sharing based on blockchain. *2021 IEEE 6th International Conference on Big Data Analytics, ICBDA 2021*, 155–159. https://doi.org/10.1109/ICBDA51983.2021.9402995

**98.**Pendleton, L. H., Beyer, H., Estradivari, Grose, S. O., Hoegh-Guldberg, O., Karcher, D. B., Kennedy, E., Llewellyn, L., Nys, C., Shapiro, A., Jain, R., Kuc, K., Leatherland, T., O’Hainnin, K., Olmedo, G., Seow, L., Tarsel, M., & Blasiak, R. (2019). Disrupting data sharing for a healthier ocean. *ICES Journal of Marine Science*, *76*(6), 1415–1423. https://doi.org/10.1093/ICESJMS/FSZ068

**99**.Boyer, T.P., O.K. Baranova, C. Coleman, H.E. Garcia, A. Grodsky, R.A. Locarnini, A.V. Mishonov, C.R. Paver, J.R. Reagan, D. Seidov, I.V. Smolyar, K. Weathers, M.M. Zweng. (2018): World Ocean Database 2018. A.V. Mishonov, Technical Ed., NOAA Atlas NESDIS 87.

**101**.Neuralink. (2022). Home - Neuralink. Retrieved May 12, 2022, from https://neuralink.com/

**102**.Google Glass. (n.d.). Glass – Discover Glass Enterprise Edition. Retrieved May 12, 2022, from https://www.google.com/glass/start/

**103**.Bostrom, N. (2005). A history of transhumanist thought. *Journal of Evolution and Technology,* 14(1).

**104.** Journal of Posthuman Studies: Philosophy, Technology, Media. (n.d.) Sorgner, S., & Shin, S. (eds.) *Penn State University Press.* Retrieved May 12, 2022, from https://www.psupress.org/Journals/jnls_JPHS.html

**105.**Kroodsma, D. (2022). A radar-illuminated ocean reveals dark fleets*.* Global Fishing Watch. Retrieved May 12, 2022, from https://globalfishingwatch.org/data/radar-illuminated-ocean/

**106.**Bergman, B. (2021). Systematic data analysis reveals false vessel tracks*.* Global Fishing Watch. Retrieved May 12, 2022, from https://globalfishingwatch.org/data/analysis-reveals-false-vessel-tracks/

**107**.Hendry, A. P., Gotanda, K. M., & Svensson, E. I. (2017). Human influences on evolution, and the ecological and societal consequences. *Philosophical Transactions of the Royal Society of London. Series B, Biological Sciences*, *372*(1712). https://doi.org/10.1098/RSTB.2016.0028

**108.**United Nations Decade of Ocean Science for Sustainable Development. (n.d.). Join the Ocean Decade Global Stakeholder Forum. Retrieved May 12, 2022, from https://www.oceandecade.org/sign-up/

**109**.Save the Waves Coalition. (n.d.). Save the Waves mobile app - Ocean Decade. Retrieved May 12, 2022, from https://www.oceandecade.org/actions/save-the-waves-mobile-app/

**110.**Selbe, S. (2013). SoarOcean. Project details. National Geographic Society. Retrieved May 12, 2022, from http://soarocean.org/project-details/

**111**. Sydney Institute of Marine Science. (n.d.). Animal-Borne Ocean Sensors (AniBOS): A decadal vision through new eyes - Ocean Decade. Retrieved May 12, 2022, from https://www.oceandecade.org/actions/animal-borne-ocean-sensors-anibos-a-decadal-vision-through-new-eyes/

**112.**Scripps Institution of Oceanography, U. S. D. (n.d.). Argo. Retrieved May 12, 2022, from https://argo.ucsd.edu/

**113**.King, A. J., George, A., Buckle, D. J., Novak, P. A., & Fulton, C. J. (2018). Efficacy of remote underwater video cameras for monitoring tropical wetland fishes. *Hydrobiologia*, *807*(1), 145–164. https://doi.org/10.1007/S10750-017-3390-1/TABLES/4

**114**.Howard, B. (2016). Watch how drones fight pirate fishing from the sky. National Geographic. Retrieved May 12, 2022, from https://www.nationalgeographic.com/history/article/drones-fight-pirate-fishing-belize-conservation

**115**.Longépé, N., Hajduch, G., Ardianto, R., Joux, R. de, Nhunfat, B., Marzuki, M. I., Fablet, R., Hermawan, I., Germain, O., Subki, B. A., Farhan, R., Muttaqin, A. D., & Gaspar, P. (2018). Completing fishing monitoring with spaceborne Vessel Detection System (VDS) and Automatic Identification System (AIS) to assess illegal fishing in Indonesia. *Marine Pollution Bulletin*, *131*, 33–39. https://doi.org/10.1016/J.MARPOLBUL.2017.10.016

**116.**Dagorn, L., Holland, K. N., Restrepo, V., & Moreno, G. (2013). Is it good or bad to fish with FADs? What are the real impacts of the use of drifting FADs on pelagic marine ecosystems? *Fish and Fisheries*, *14*(3), 391–415. https://doi.org/10.1111/J.1467-2979.2012.00478.X

**117.**Lehman, J. (2018a). From ships to robots: The social relations of sensing the world ocean. *Social Studies of Science*, *48*(1), 57–79. https://doi.org/10.1177/0306312717743579

**118.**Ratté, S. (2019). (Un)seen seas: Technological mediation, oceanic imaginaries, and future depths. *Environment and Society: Advances in Research*, *10*(1), 141–157. https://doi.org/10.3167/ares.2019.100109

**119**.Gabrys, J., Hayles, K., Krapp, P., Raley, R., & Weber, S. (2016). Program Earth Environmental Sensing Technology and the Making of a Computational Planet. *University of Minnesota Press.* https://doi.org/10.5749/j.ctt1b7x5gq

**120.**Galtsoff, P. (1934). The Mystery of the Ocean. *The Scientific Monthly*, 172–175.
